# Supplementary material
Source: PubMed Central journal article supplement (PMC6434137)
Supplement: IAI.00716-18-s0001.pdf [file IAI.00716-18-s0001.pdf]

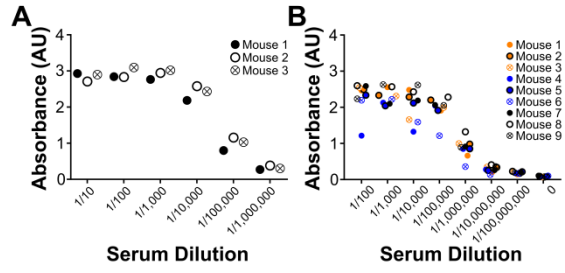

**Fig. S1:** Polysera from immunized mice show high titers for respective antigens. (A) Polysera titers for the immunization of three mice with RII. (B) Polysera titers for the immunization of three mice each for RII (black), F1 (orange), F2 (blue)
