# Supplementary material
Source: PubMed Central journal article supplement (PMC6434137)
Supplement: IAI.00716-18-s0002.pdf [file IAI.00716-18-s0002.pdf]

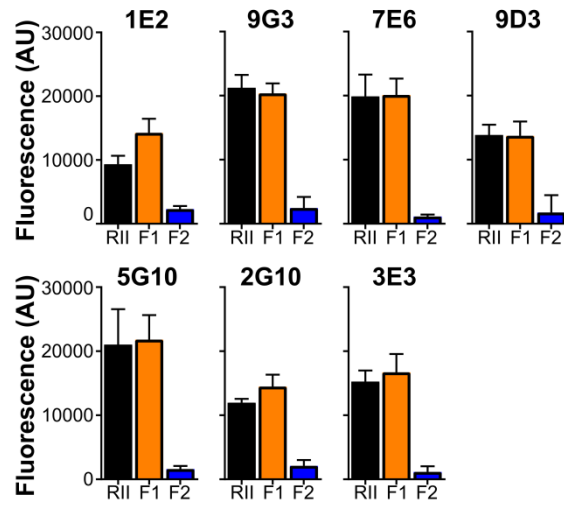

**Fig. S2:** mAbs derived from the F1 immunization bind both RII and F1 but not F2. ELISA binding assay for mAbs 1E2, 9G3, 7E6, 9D3, 5G10, 2G10, and 3E3 utilizing RII (black bars), F1 (orange bars), and F2 (blue bars) coated plates.
