# Supplementary material
Source: PubMed Central journal article supplement (PMC6434137)
Supplement: IAI.00716-18-s0003.pdf [file IAI.00716-18-s0003.pdf]

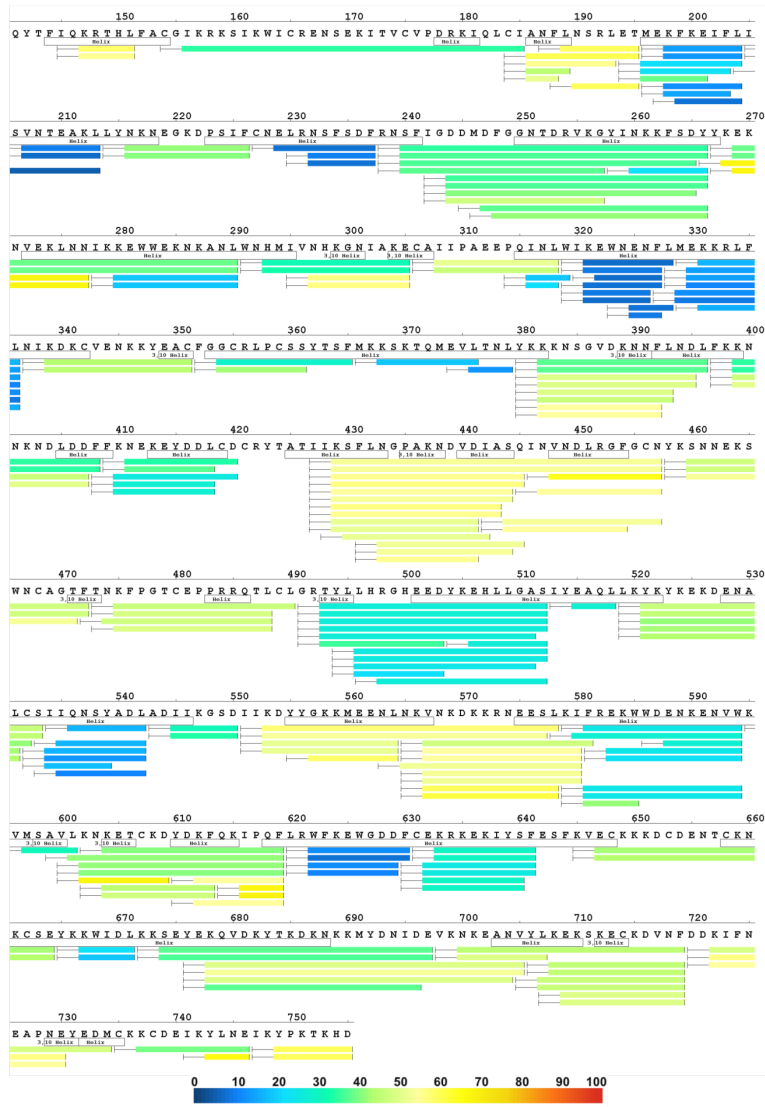

**Fig. S3:** Sequence coverage map of peptic digestion of PfEBA140 protein. A total of 207 peptides with a sequence coverage of 98% were identified (each bar indicates a peptide identified by mass spectrometry). The colored bars represent the average deuterium uptake percentage (D%) for the duplicate analysis of six exchange time points (the warmer the color the higher the deuterium uptake). The helical regions identified in crystal structure of the PfEBA140 (PDB ID 4GF2) are shown with boxes underneath the sequences.
