# Supplementary material
Source: PubMed Central journal article supplement (PMC6434137)
Supplement: IAI.00716-18-s0005.pdf [file IAI.00716-18-s0005.pdf]

| Groups Compared | 3D7         |     | HB3         |     | Groups Compared | 3D7         |     | HB3         |    |
|-----------------|-------------|-----|-------------|-----|-----------------|-------------|-----|-------------|----|
|                 | Significant |     | Significant |     |                 | Significant |     | Significant |    |
| Ctrl vs 5G10    | Yes         | *** | Yes         | *** | 7E6 vs 1G6      | Yes         | *** | Yes         | *  |
| Ctrl vs 7E6     | Yes         | *** | Yes         | *** | 7E6 vs 4B7      | Yes         | *** | Yes         | *  |
| Ctrl vs 9G3     | Yes         | *** | Yes         | *** | 7E6 vs 4E7      | Yes         | *** | No          | ns |
| Ctrl vs 9D3     | Yes         | *** | Yes         | *** | 9G3 vs 9D3      | No          | ns  | No          | ns |
| Ctrl vs 1B10    | No          | ns  | Yes         | *   | 9G3 vs 1B10     | Yes         | *** | Yes         | ** |
| Ctrl vs 1G6     | Yes         | *   | Yes         | *   | 9G3 vs 1G6      | Yes         | *** | Yes         | ** |
| Ctrl vs 4B7     | Yes         | *** | Yes         | *   | 9G3 vs 4B7      | Yes         | **  | Yes         | ** |
| Ctrl vs 4E7     | Yes         | *   | Yes         | **  | 9G3 vs 4E7      | Yes         | *** | Yes         | *  |
| 5G10 vs 7E6     | No          | ns  | No          | ns  | 9D3 vs 1B10     | Yes         | **  | Yes         | *  |
| 5G10 vs 9G3     | No          | ns  | No          | ns  | 9D3 vs 1G6      | Yes         | *   | No          | ns |
| 5G10 vs 9D3     | No          | ns  | No          | ns  | 9D3 vs 4B7      | No          | ns  | Yes         | *  |
| 5G10 vs 1B10    | Yes         | *** | Yes         | *** | 9D3 vs 4E7      | Yes         | *   | No          | ns |
| 5G10 vs 1G6     | Yes         | *** | Yes         | *** | 1B10 vs 1G6     | No          | ns  | No          | ns |
| 5G10 vs 4B7     | Yes         | *** | Yes         | *** | 1B10 vs 4B7     | No          | ns  | No          | ns |
| 5G10 vs 4E7     | Yes         | *** | Yes         | *** | 1B10 vs 4E7     | No          | ns  | No          | ns |
| 7E6 vs 9G3      | No          | ns  | No          | ns  | 1G6 vs 4B7      | No          | ns  | No          | ns |
| 7E6 vs 9D3      | No          | ns  | No          | ns  | 1G6 vs 4E7      | No          | ns  | No          | ns |
| 7E6 vs 1B10     | Yes         | *** | Yes         | **  | 4B7 vs 4E7      | No          | ns  | No          | ns |

**Table S1:** Significant value of differences in antibody neutralization of parasite growth. The values were determined by one-way ANOVA with Dunnett's multiple comparison tests between control and EBA140 monoclonal antibodies, or between the F1-specific and F2-specific antibodies, or each of the antibody within F1 cohort (or F2 cohort) compared to each other for their neutralization effects.
