# Supplementary material
Source: PubMed Central journal article supplement (PMC6434137)
Supplement: IAI.00716-18-s0006.pdf [file IAI.00716-18-s0006.pdf]

| Start | End | Sequence                        | Charge | 1E2         | 2G10        | 9G3         | 3E3         | 5G10        | 7E6         | 9D3         | 4E7  |
|-------|-----|---------------------------------|--------|-------------|-------------|-------------|-------------|-------------|-------------|-------------|------|
|       |     |                                 |        | $\Delta\%D$ |      |
| 145   | 151 | IQRRTL                          | 1      | 2.2         | 1.4         | 4.2         | 4.9         | 4           | -2.4        | 3.4         | 3.1  |
| 154   | 185 | CGIKRKSIVKWCRENSEKITVCPDRKIQLCI | 5      | 0           | 1.7         | 1.3         | 5.9         | 3.8         | 2.8         | 1.5         | 2.2  |
| 184   | 189 | CIANFL                          | 1      | 0.6         | 0.4         | 2.9         | 2.8         | 2.9         | 2.7         | 13.8        | 0.6  |
| 184   | 195 | CIANFLNSRLET                    | 2      | 1.5         | -1.3        | 3.1         | 0.2         | -           | 7.1         | -1.6        | 1.6  |
| 188   | 195 | FLNSRLET                        | 2      | 2.6         | 3.3         | 6.4         | 9.7         | 8.8         | 8.6         | -           | 1.8  |
| 196   | 204 | MEKFKEIFL                       | 2      | 0.2         | 0.6         | 2.5         | 3           | 2.9         | 2.6         | 0.2         | 1.2  |
| 205   | 213 | ISVNTAKL                        | 1      | 1.9         | -2.6        | -1.2        | -1.4        | -1.9        | -0.2        | -3.5        | -2.4 |
| 214   | 226 | LYNKNEGKDPSIF                   | 2      | -2.9        | 2.8         | 5.9         | 8           | 6.7         | 6.5         | 12.5        | 3.3  |
| 227   | 237 | CNELRNSFSDF                     | 2      | -0.2        | 0           | 1.7         | 2.5         | -0.3        | -0.3        | 0           | 0.2  |
| 238   | 266 | RNSFIGDDMDFGGNTDRVKGYNKKFSDY    | 4      | -0.1        | 0.5         | 1.9         | 2.3         | 2.4         | 1.3         | 2.2         | 0.9  |
| 267   | 277 | YKEKNVEKLNN                     | 2      | 2           | 2           | 2           | 3.8         | 3.6         | 12.8        | 3.4         | 2.8  |
| 278   | 290 | IKKEWWEKNKANL                   | 2      | -0.4        | 0.5         | 1.9         | 1.9         | 0.5         | 1.6         | 1.4         | 0.4  |
| 291   | 305 | WNHMIVNHKGNIKE                  | 2      | 2.7         | 2.3         | 3.2         | 4.7         | 4.1         | 2.1         | -3.3        | 3    |
| 306   | 318 | CAIHPAEEPQINL                   | 2      | 1.5         | 1.3         | 4.4         | 4.4         | 4.6         | 4.4         | 3.4         | 1.8  |
| 319   | 326 | WIKEWNEN                        | 2      | -1.6        | 0.7         | -1.1        | 1.4         | -0.6        | -0.1        | 0.1         | 0.4  |
| 319   | 327 | WIKEWNENF                       | 2      | -1.5        | 0.5         | -0.6        | 1.3         | 0.4         | 0.5         | 0.8         | 0.3  |
| 328   | 336 | LMEKKRFL                        | 2      | -1.7        | -6.7        | -1.2        | -7.8        | -10.1       | 0.2         | 0.6         | 0.3  |
| 337   | 351 | NIKDKCVENKYEAC                  | 3      | 0.9         | -7.8        | 42          | -4.8        | -4.5        | 0.1         | 1           | 1.6  |
| 352   | 365 | FGGCRPCSSYTSF                   | 2      | 0.9         | -1.5        | 6.6         | 4.7         | -           | 6.8         | -           | 2.3  |
| 366   | 376 | MKKSQTQMEVL                     | 2      | -1.8        | -3.1        | -6.7        | 3.4         | -1.6        | -1.2        | 0.3         | -1.2 |
| 374   | 379 | EVLTNL                          | 1      | -5.8        | -1.3        | -6.5        | -0.6        | -1.2        | -0.7        | 1.2         | -0.2 |
| 380   | 396 | YKKKNSGVDKNNFLNDL               | 2      | -22.4       | 1.7         | -17.9       | 6.3         | 4.9         | 8.4         | 6.5         | 2.8  |
| 397   | 407 | FKKNNKNDLDD                     | 3      | -11.8       | 2.7         | -9.9        | 5.1         | 4.5         | 4.7         | 5           | 2.8  |
| 408   | 418 | FFKNEKEYDDL                     | 3      | 0.9         | -14.9       | 4           | -10.1       | -14.2       | 7.8         | 6.6         | 3.7  |
| 409   | 418 | FKNEKEYDDL                      | 2      | 0.1         | -19.4       | 2.9         | -15.2       | -18.1       | 5.5         | 5.1         | 3.3  |
| 409   | 420 | FKNEKEYDDLCD                    | 2      | 0.2         | -15.6       | 2.3         | -13.1       | -16.9       | -           | 6.6         | 3.2  |
| 427   | 441 | IISFLNGPAKNDVD                  | 2      | -1.5        | -0.1        | 0.9         | 2.4         | 2.8         | 2.9         | 2.3         | 1.3  |
| 442   | 457 | IASQINVNDLRGFGCN                | 2      | 1.2         | 2.5         | 6.2         | 8.3         | 8.9         | 6.9         | -           | 4.5  |
| 445   | 457 | QINVNDLRGFGCN                   | 2      | 0.5         | 0.5         | 2.5         | 2.7         | 6.2         | 3.7         | 3.9         | 3.4  |
| 458   | 472 | YKSNNEKSWNCAGTF                 | 2      | -1.5        | -1.4        | 2.9         | 1.8         | -0.3        | 4.8         | 3.9         | -0.5 |
| 473   | 490 | TNKFPGTCEPRRQTLCL               | 3      | -0.1        | 0.7         | 1.9         | 3.4         | 8.8         | 4.6         | 4.2         | 5.7  |
| 491   | 503 | GRTYLLHRGHEED                   | 3      | 2.4         | 1.4         | 2           | 5           | 0.4         | 4.3         | -4.5        | 2.2  |
| 504   | 512 | YKEHLLGAS                       | 2      | 0.6         | 0.7         | 0.4         | 1           | 1.1         | 0.7         | -0.2        | 9.2  |
| 513   | 518 | IYEAQL                          | 1      | -0.5        | 0.9         | 0.9         | -12.9       | 2.8         | 0.9         | 3.1         | 17.4 |
| 519   | 533 | LKYKYKEDENALCS                  | 3      | 3.3         | 3.2         | 4.5         | 5.2         | 4           | 6           | 1.6         | 7.5  |
| 532   | 542 | CSIIQNSYADL                     | 2      | -0.5        | 7.6         | -2.8        | 0.1         | -3.7        | 0.7         | 4.1         | 28.1 |
| 543   | 550 | ADHKGSD                         | 1      | 0.8         | 0.7         | 0.4         | 1.3         | 1.2         | 0.4         | 1           | 14.1 |
| 551   | 564 | IIKDYYGKKMEENL                  | 3      | -1.5        | 1.8         | 4           | 4.6         | 5.1         | 5.7         | 5.5         | 8.2  |
| 565   | 578 | NKVNKDKKRNEESL                  | 2      | 4           | 2.1         | 4.5         | 5.6         | 3.5         | 3.1         | 2.8         | 3.3  |
| 579   | 585 | KIFREKW                         | 2      | 2.4         | 1.1         | 3.1         | 3           | 3.5         | 3.1         | -           | 11.1 |
| 581   | 594 | FREKWWDENKENVW                  | 2      | 1.4         | 2           | 7.7         | 4.7         | 6           | 5.5         | -1.1        | 9.5  |
| 595   | 601 | KVMSAVL                         | 1      | 0.4         | -0.2        | -           | -0.3        | 1.5         | -           | -           | 19.3 |
| 599   | 619 | AVLKNKETCKDYDKFQKIPQF           | 3      | 2.9         | 2.2         | 6.3         | 5.7         | 5.5         | 6.4         | 6           | 6.2  |
| 610   | 619 | YDKFQKIPQF                      | 2      | 1.5         | 1.8         | 5           | 5.4         | 6.8         | 6           | 7.3         | 6.1  |
| 620   | 629 | LRWFKEWGDD                      | 2      | 0.4         | 4.1         | 1.3         | 5.4         | 1.2         | 1.5         | 6.7         | 9.4  |
| 630   | 641 | FCEKRKEKIYSF                    | 3      | 1.4         | 1.8         | 2.9         | 4.1         | 3           | 2.5         | 2.6         | 3.4  |
| 645   | 664 | KVECKKKDCDENTCKNKCS             | 3/4*   | 2.5         | 1.4         | 5.7         | 3.3         | 3.6         | 4           | *2.4        | 2    |
| 665   | 671 | YKKWIDL                         | 2      | 1.3         | 1.2         | 1.3         | 1.9         | 1.4         | -           | -           | 2.2  |
| 672   | 697 | KKSEYEKQVDKYTKDKNKMYDNIDE       | 3      | -0.2        | 1.2         | 3           | 4           | 4.2         | 3.1         | 3.8         | 5    |
| 676   | 705 | YEKQVDKYTKDKNKMYDNIDEVKNKEANV   | 4      | 0.6         | 0.2         | -0.4        | 0.9         | 1.3         | -0.5        | 1           | 2.9  |
| 705   | 719 | VYLKEKSKECKDVF                  | 3      | 1.2         | -1.6        | 1.8         | 3.9         | 1.7         | 3           | 2.4         | 0.7  |
| 720   | 734 | DDKIFNEAPNEYEDM                 | 2      | 2.6         | 2.8         | 7.1         | 7           | 7.4         | 10.4        | 9.4         | 3.1  |
| 735   | 746 | CKKCDEIKYLNE                    | 2      | 4.1         | 3.2         | 3.3         | 5.6         | 5.5         | 5.7         | 2.7         | 3.8  |
| 747   | 755 | IKYPKTKHD                       | 2      | 2.5         | 2.2         | 3.5         | 4.5         | 4.3         | 2.3         | 3.9         | 3.4  |

**Table S2:** The  $\Delta D\%$  values represent the average difference of deuterium incorporation between PfEBA140 alone and the corresponding PfEBA140-antibody complex states across all six time points. Negative values of  $\Delta D\%$  indicate less deuterium incorporation in the PfEBA140-antibody state. Peptides for regions showing significantly less HDX upon binding to different mAbs are highlighted in green.
