# Supplementary material
Source: PubMed Central journal article supplement (PMC6434137)
Supplement: IAI.00716-18-s0007.pdf [file IAI.00716-18-s0007.pdf]

| <b>Mutant</b> | <b>Residues Mutated</b>    |
|---------------|----------------------------|
| <b>1</b>      | I205A, N208A, K212A        |
| <b>2</b>      | N216A, E219A               |
| <b>3</b>      | D222A, S224A               |
| <b>4</b>      | K268A, K270A               |
| <b>5</b>      | E269A, N271A, K274A        |
| <b>6</b>      | E273A, N277A               |
| <b>7</b>      | K331A, L334A, K339A        |
| <b>8</b>      | R333A, N337A, K341A        |
| <b>9</b>      | L357A, S361A               |
| <b>10</b>     | N378A, K381A, K382A        |
| <b>11</b>     | D388A, N391A, N394A        |
| <b>12</b>     | K398A, N403A, D404A, D406A |
| <b>13</b>     | K410A, E412A, K413A        |
| <b>14</b>     | E414A, D416A, D417A        |
| <b>15</b>     | K553A, K558A, E562A        |
| <b>16</b>     | Y555A, K559A, E562A        |

**Table S3:** Substituted residues listed for each mutant construct in order from N to C terminus
